# Supplementary material for: A Machine Learning Method to Assess Growth Patterns in Plants of the Family Lemnaceae
Source: Preprints.org preprint supplement (doi:10.20944/preprints202206.0408.v1), 2022-06-29
Supplement: Supplementary file 1 [file supplementary]

Protocol to analyze Lemanacae area with ilastik software.

1. Transform images from Jpeg or other formats to TIFF
2. Open ilastik
3. Select : pixel classification + object classification
4.
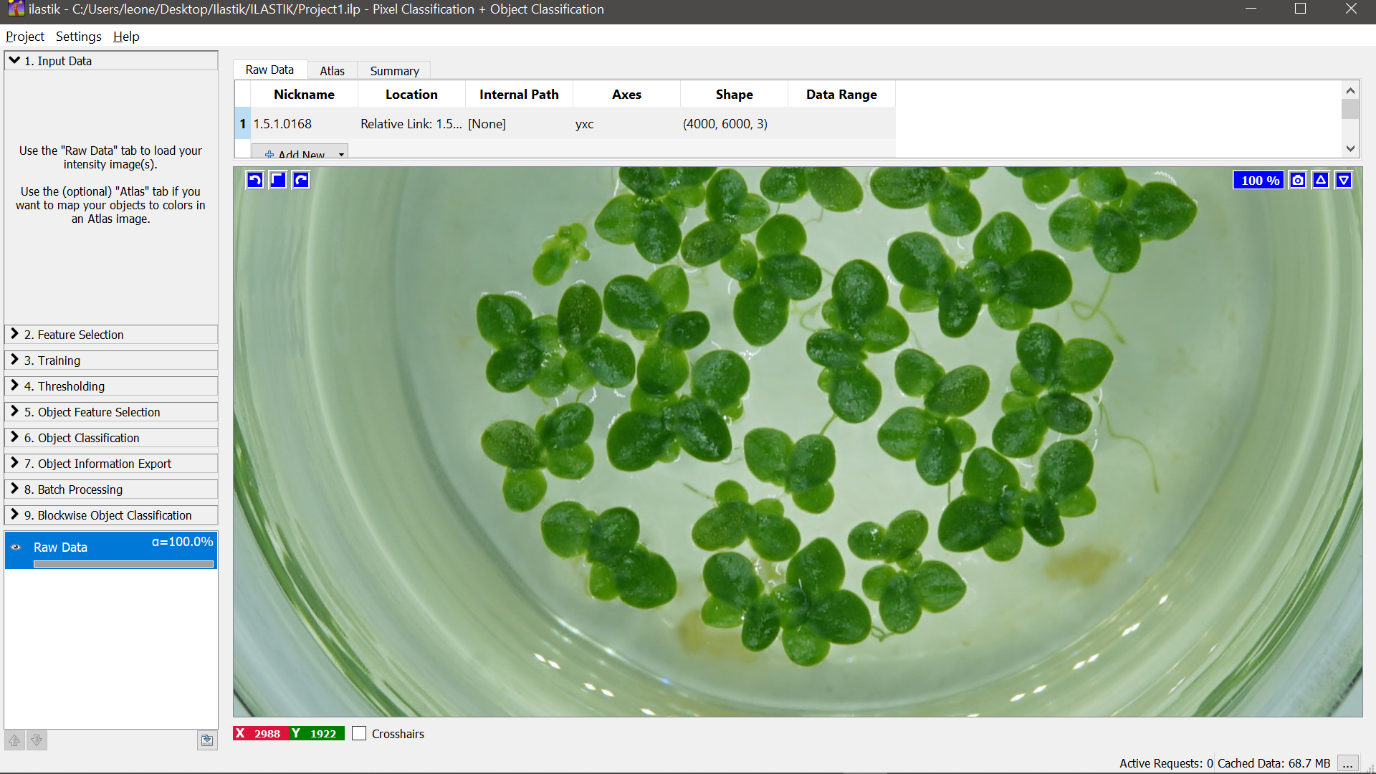
Input data (select the picture with the highest number of fronds)
5.
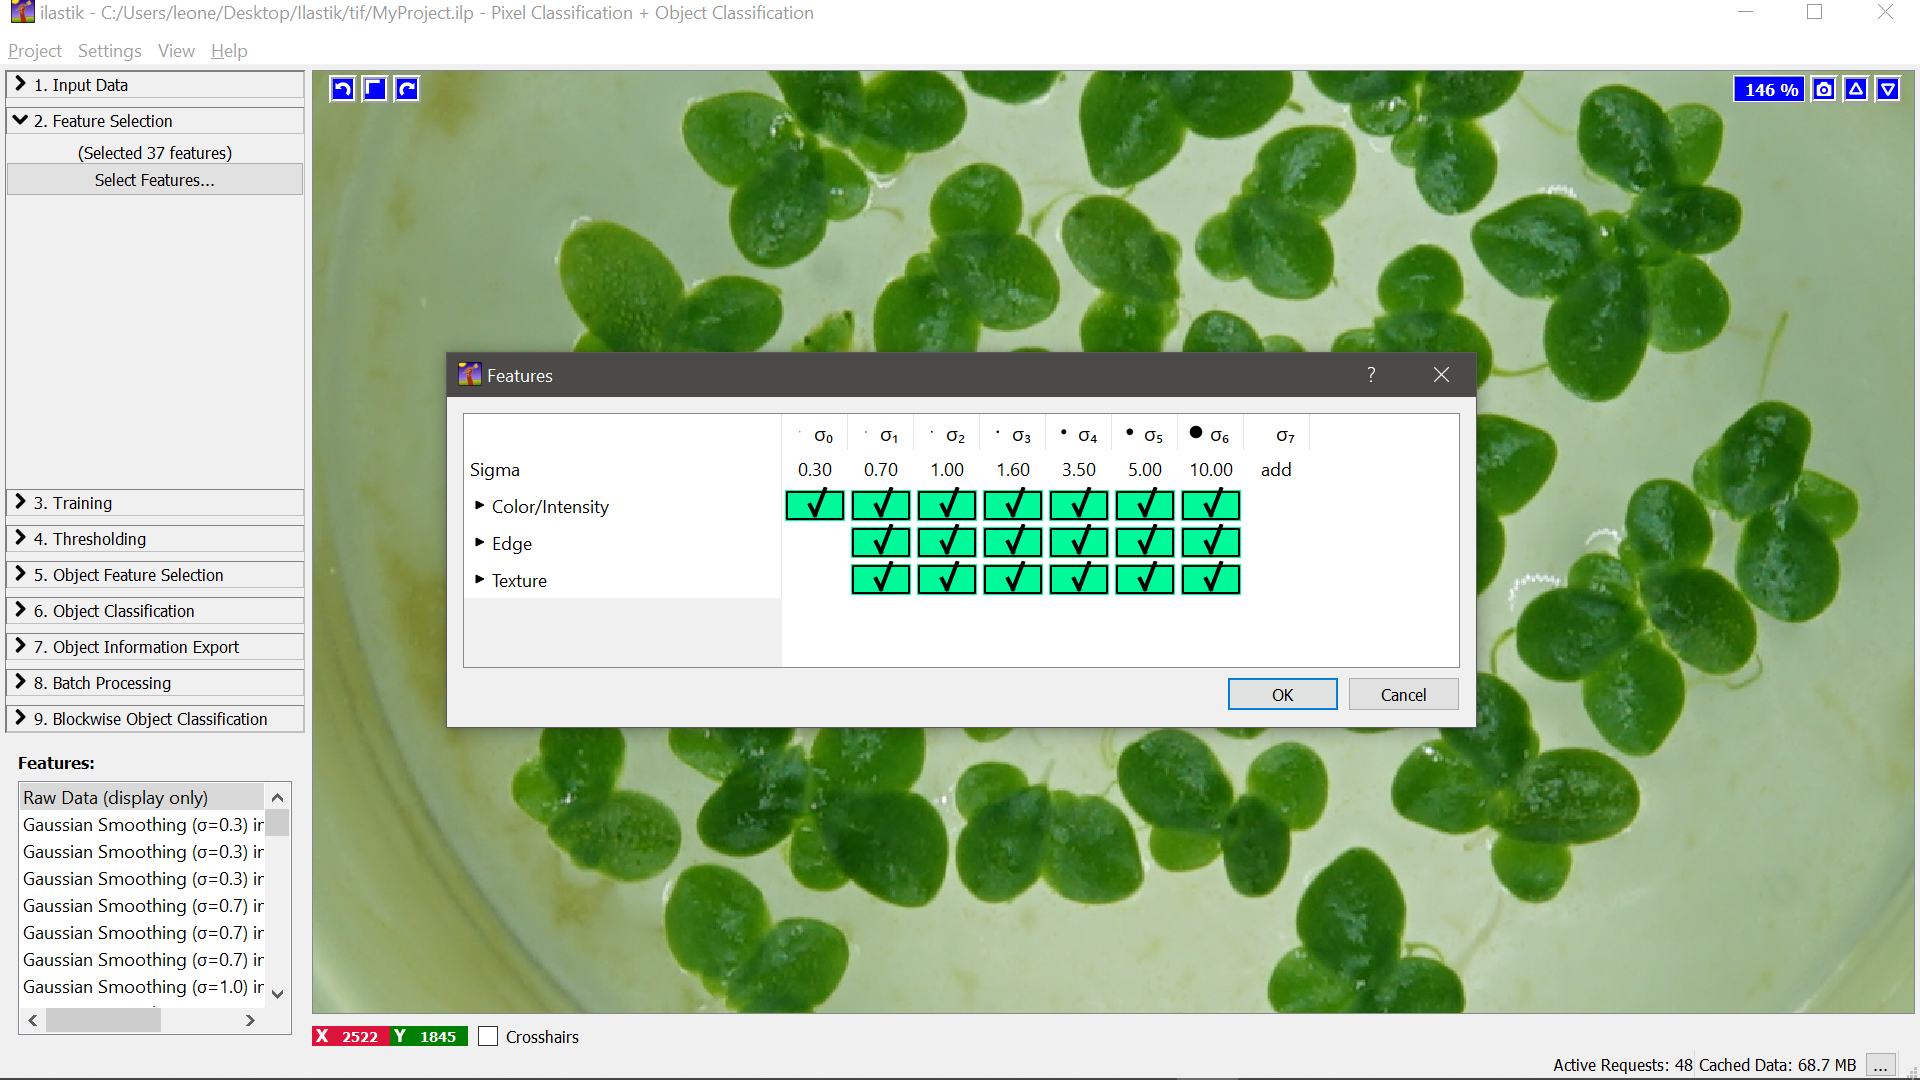
Feature selection: select αx to αy (note that the higher the number of selected features, the heavier the computational calculation will be in the following steps)
6. Training, rename labels by double clicking.


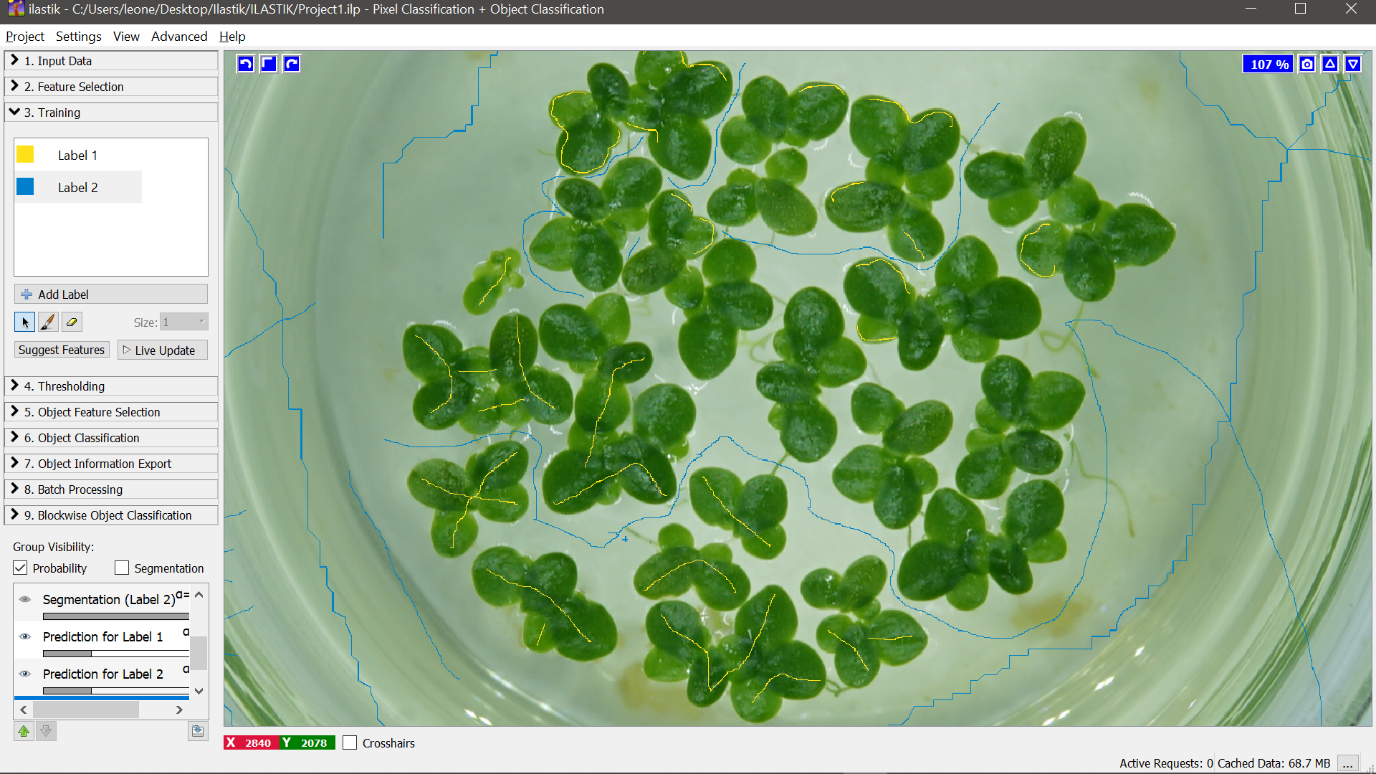


1. Suggest features
2. Feature selection (choose the most appropriate to the selected once)
3. Run feature selection
4. Select feature set
5. Apply Thresholding (standard)


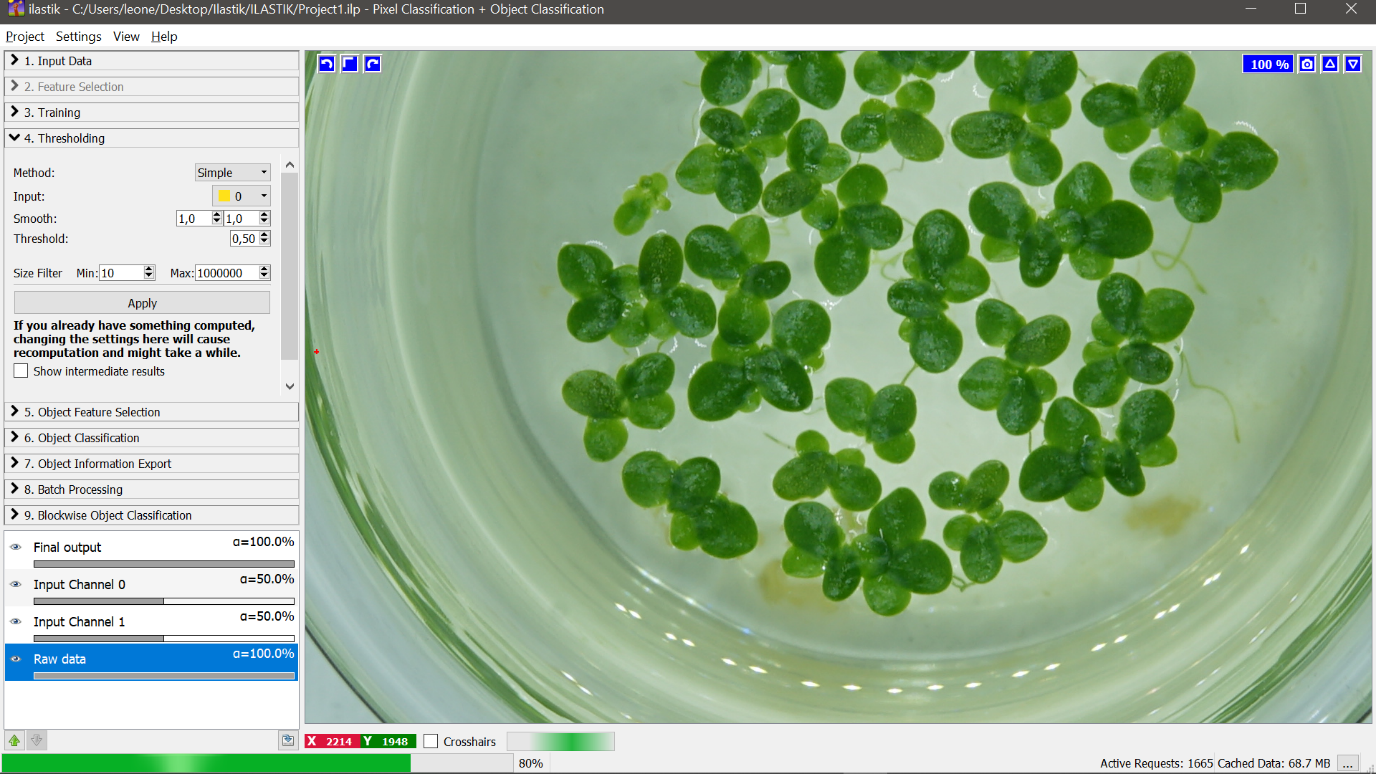


1. Object feature selection:

- Select feature: Size in pixle


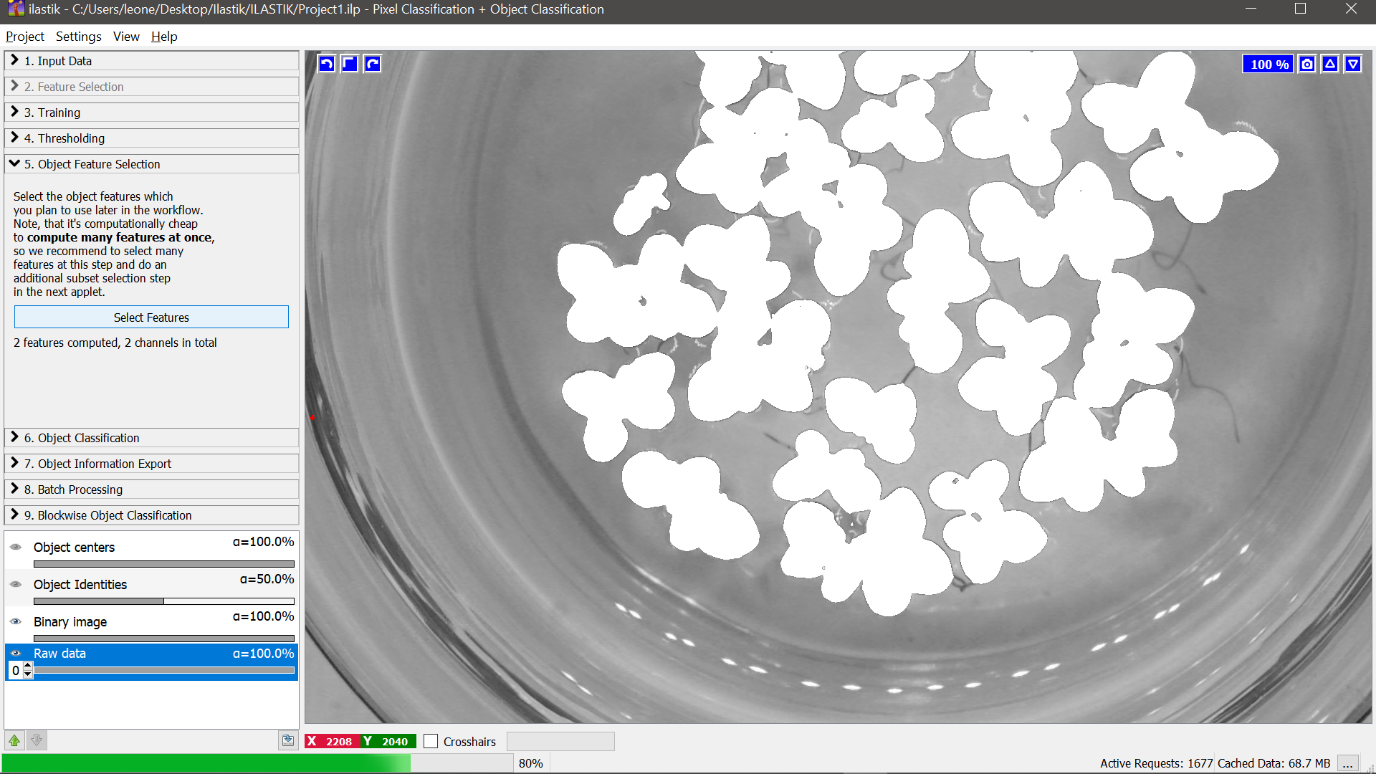

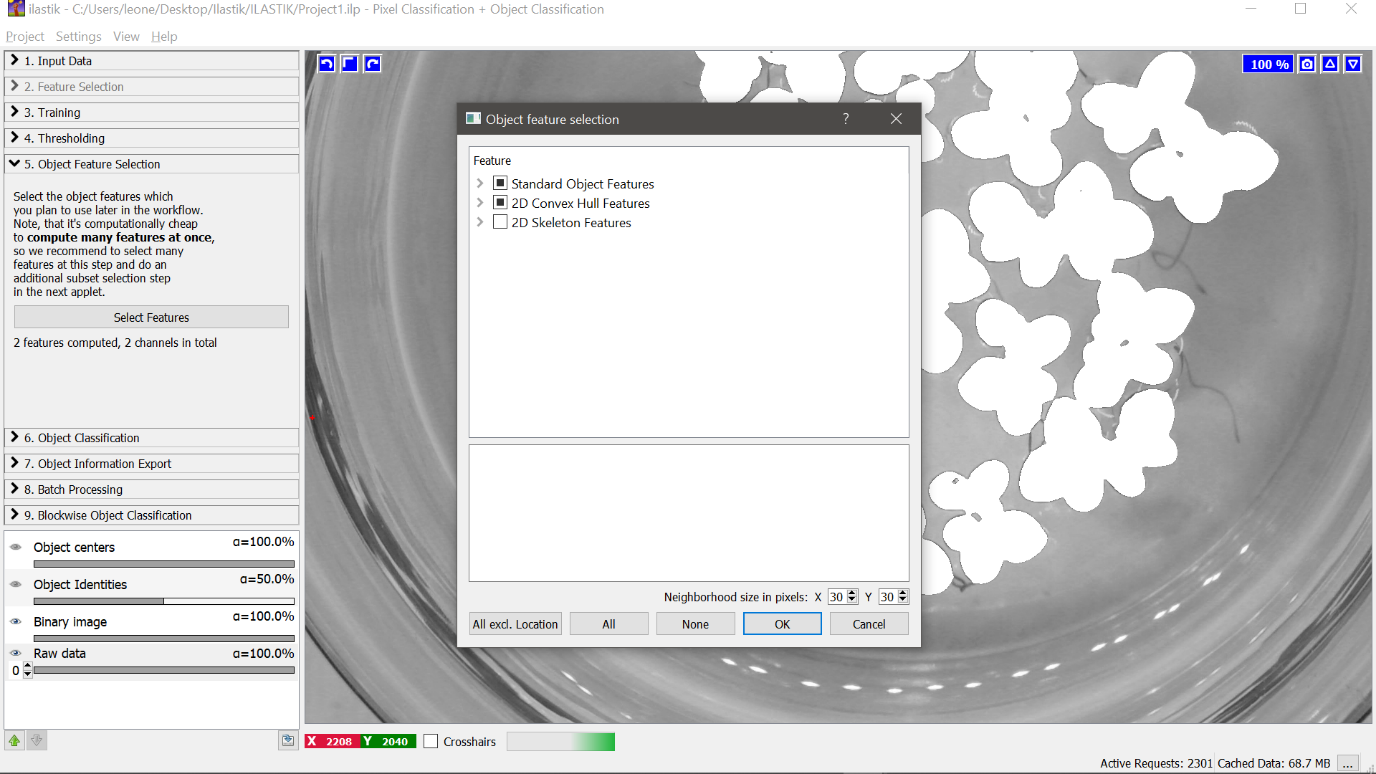


1. Object classification: add lable to the white selection


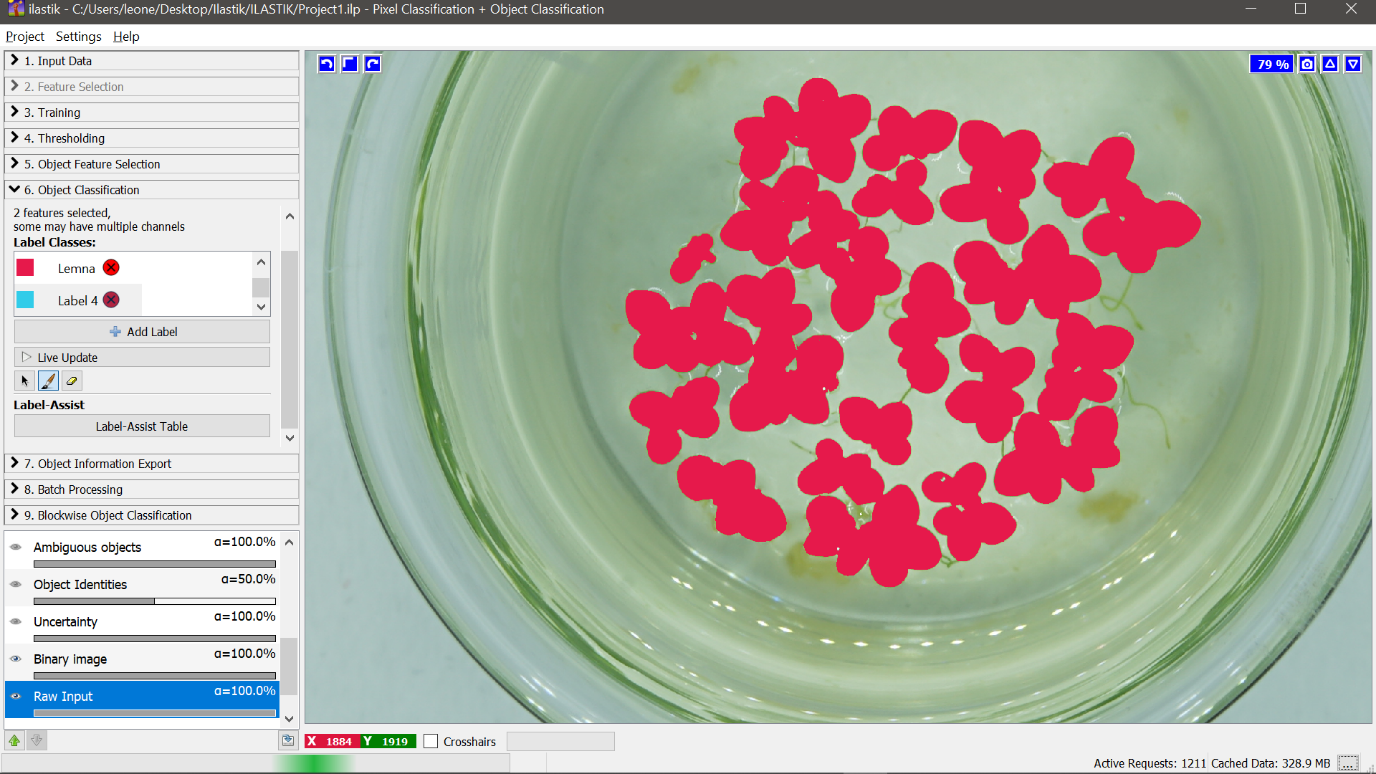


1. Object information export

- Source: object probabilities
- Choose export image setting: format .tif
-
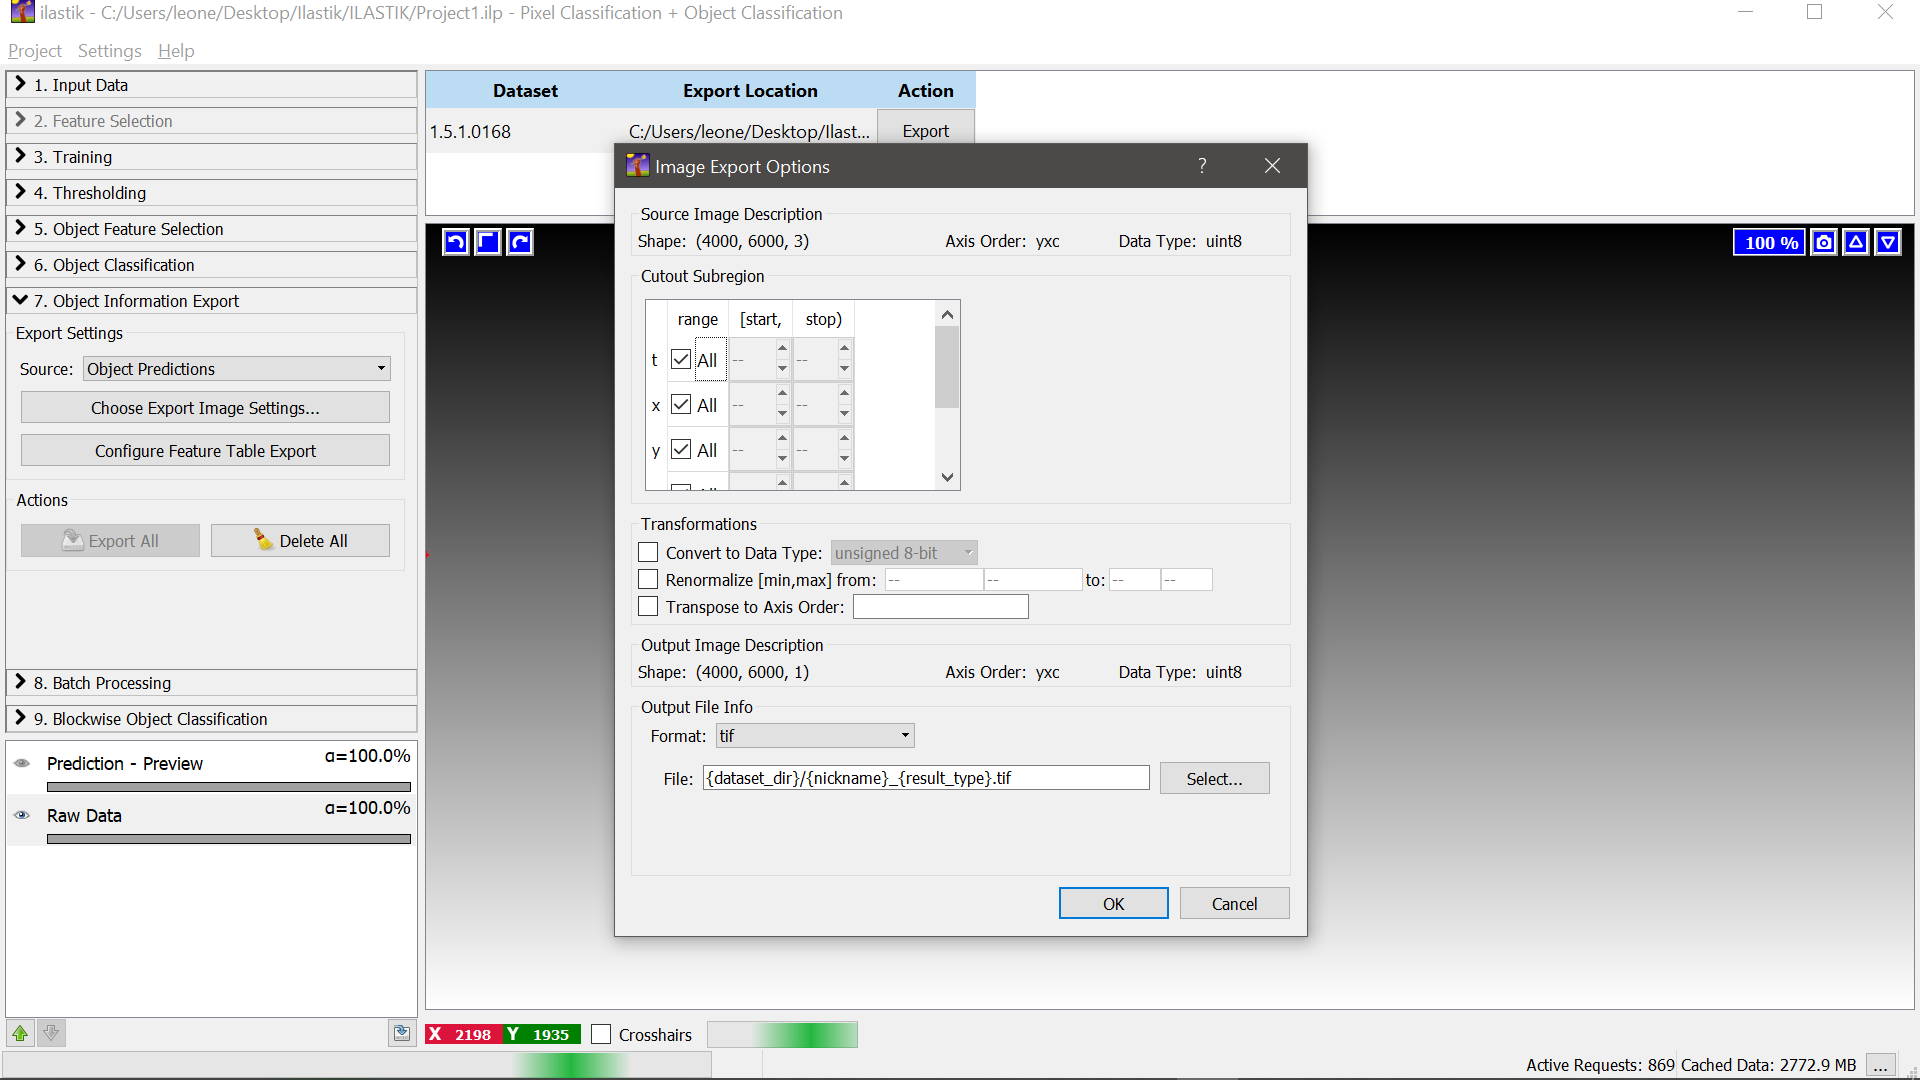
Configure table export: Format .csv


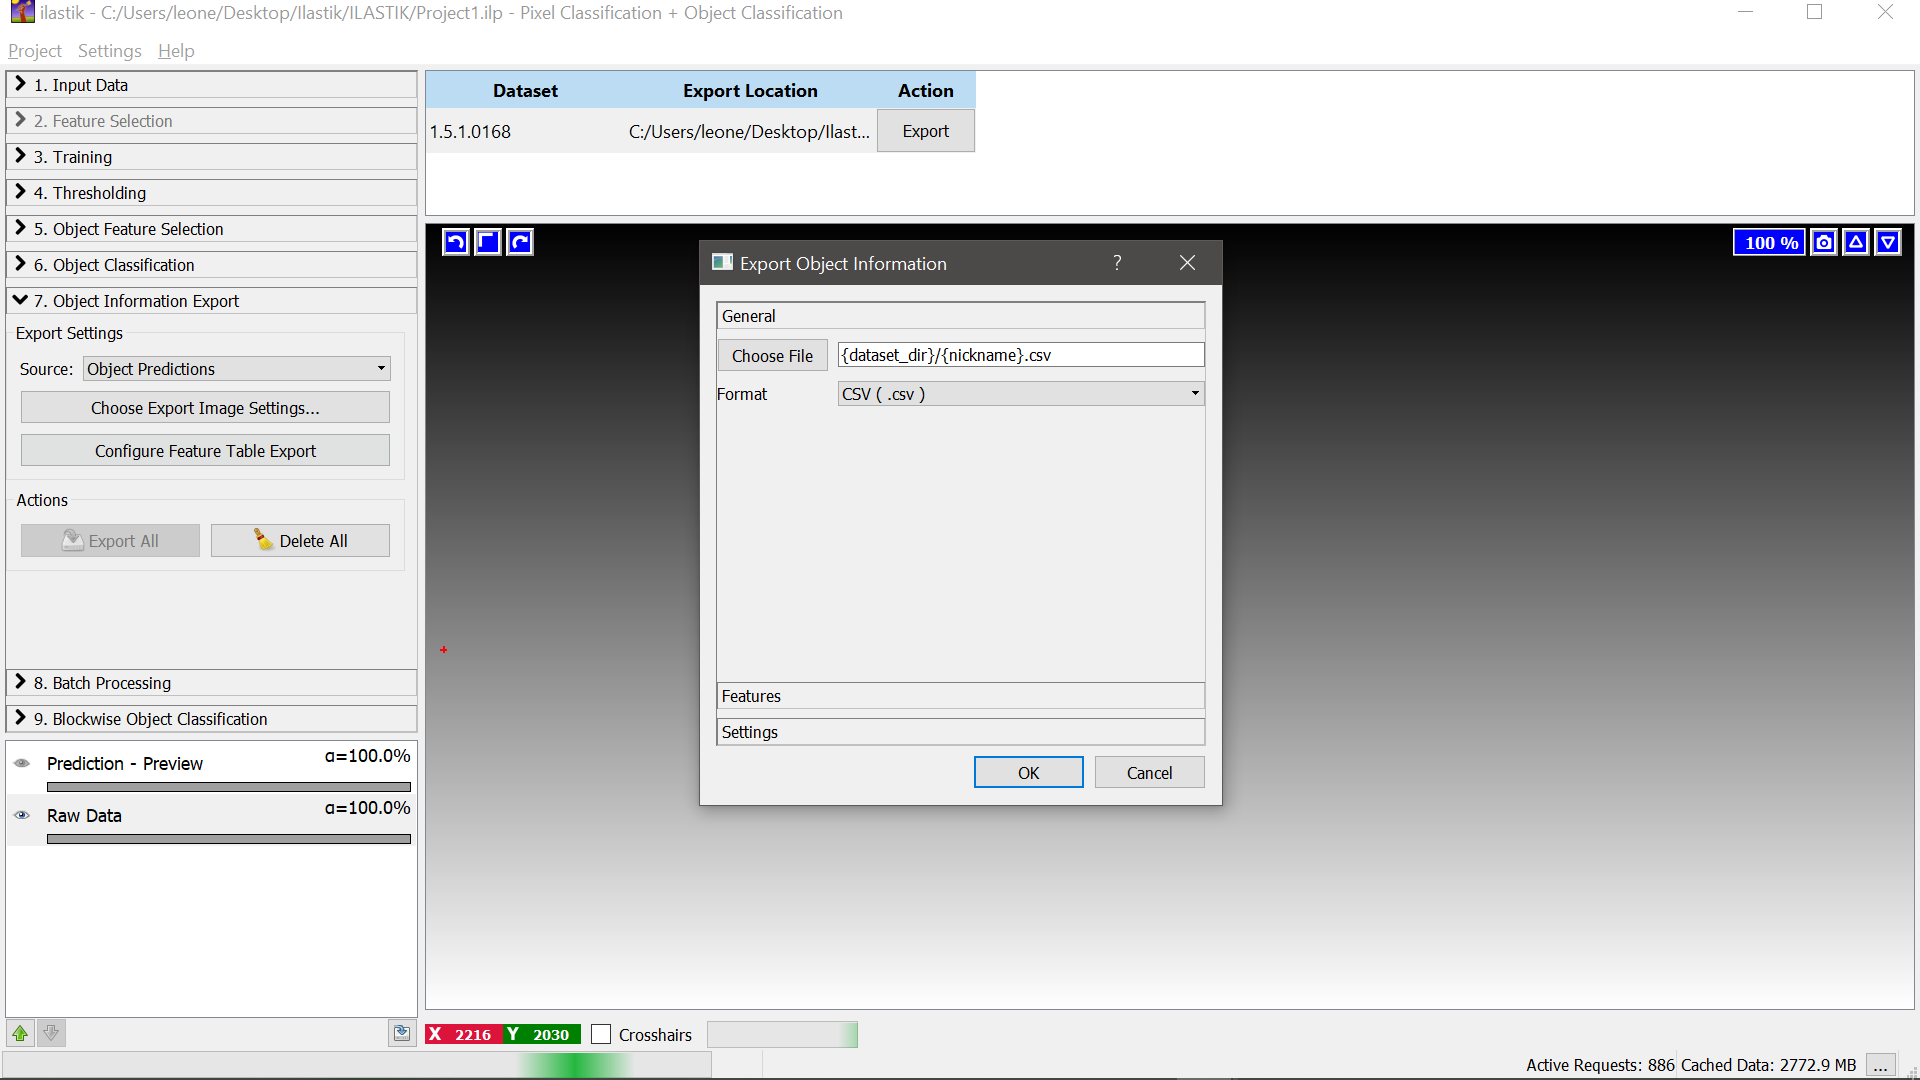


1. Batch processing
2. Process all files
3.
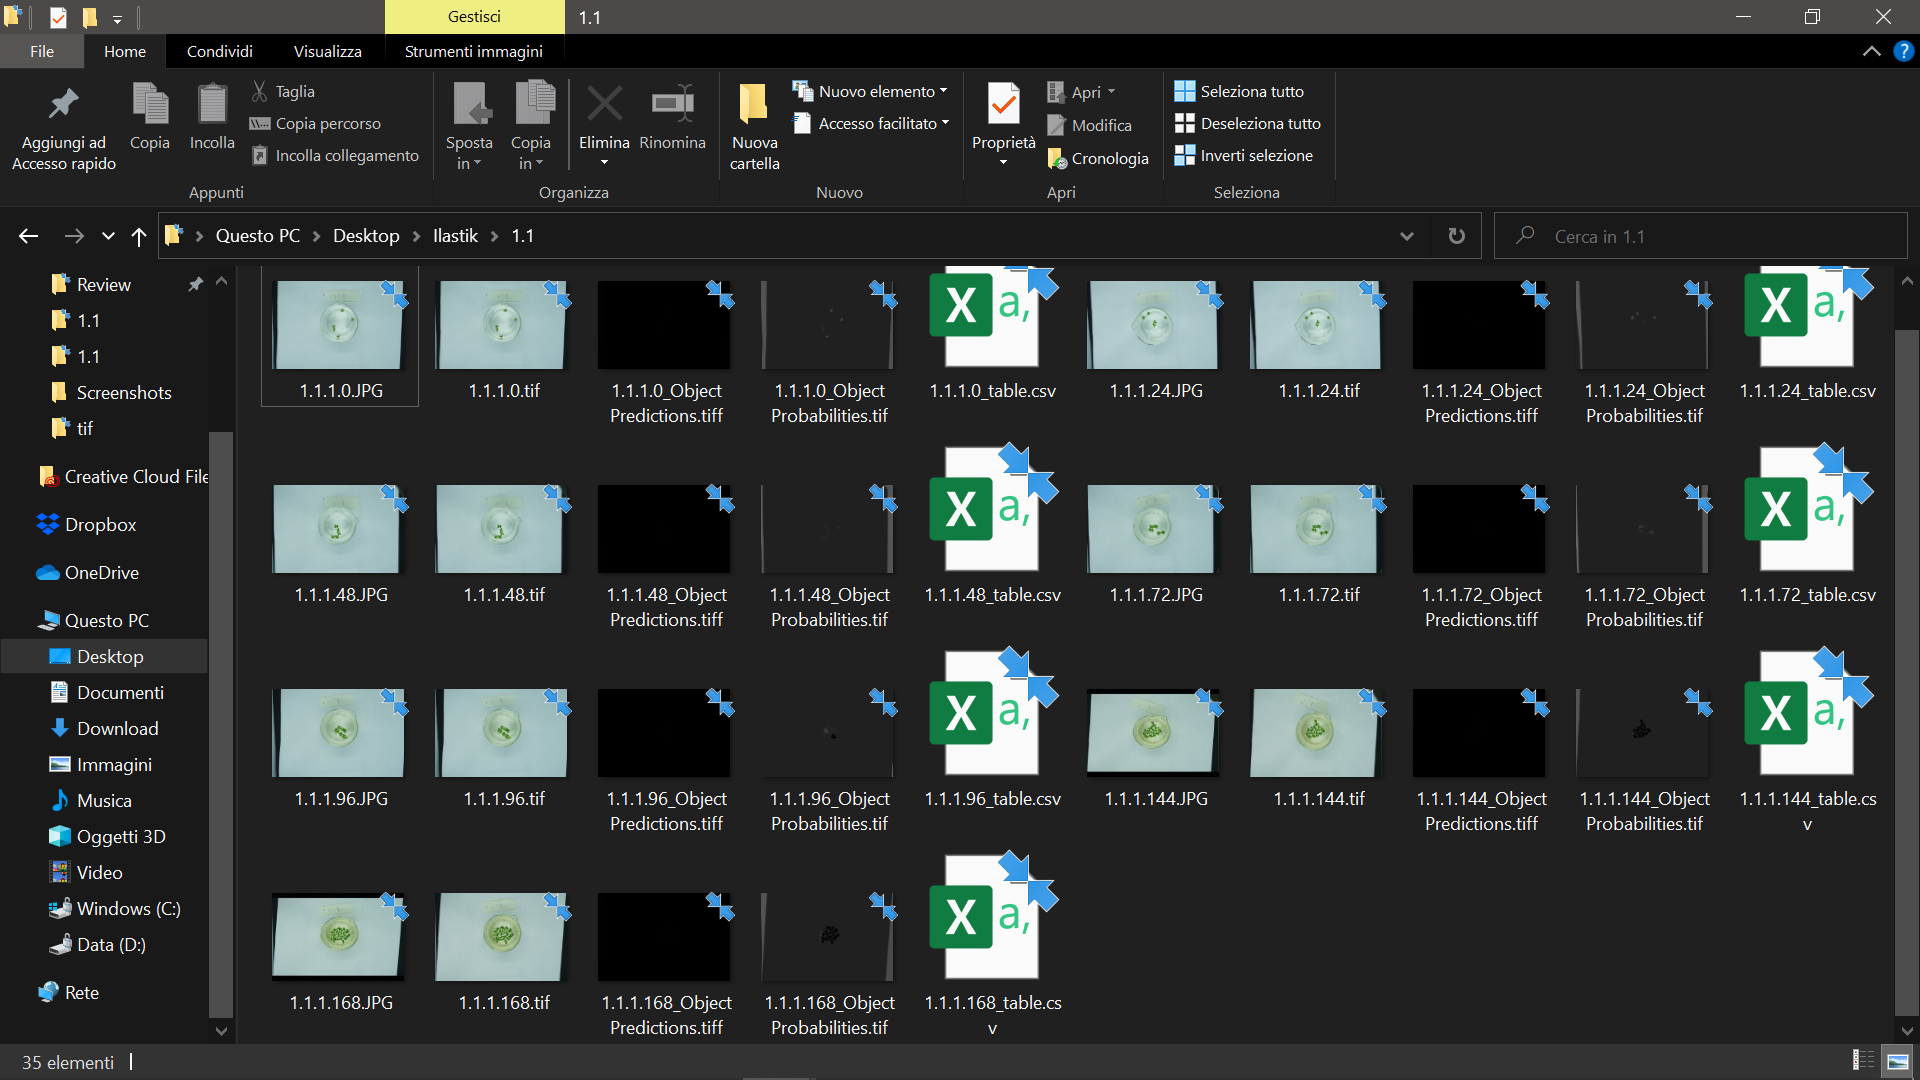
Output
